# Supplementary material
Source: PubMed Central journal article supplement (PMC3529002)
Supplement: NIHMS421842-supplement-ESI_-_Movie_S3.pdf [file NIHMS421842-supplement-ESI_-_Movie_S3.pdf]

Movie S3. - Two Tubes from Mast Cell of Mouse  
(Cytochalasin E - 40  $\mu\text{m}$  length)

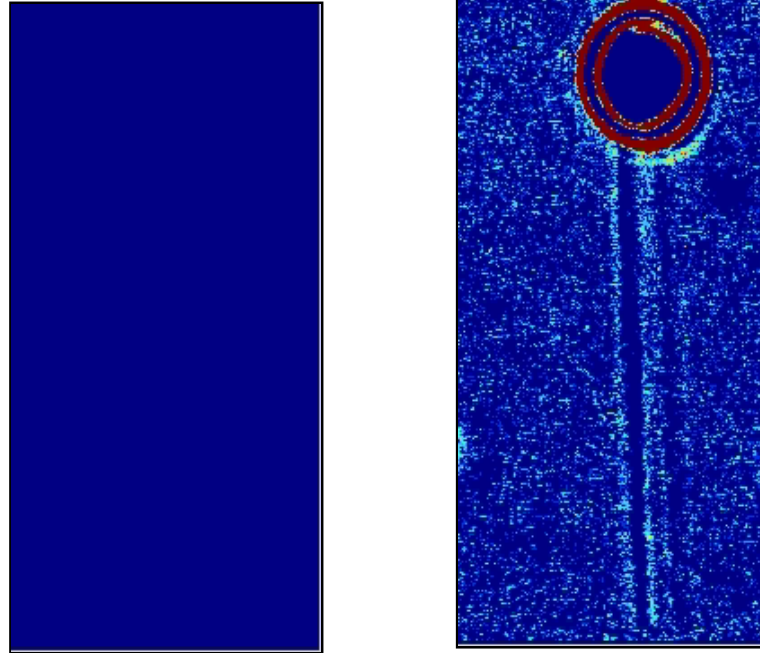

Movie S3. Two 40  $\mu\text{m}$  micron tubes formed from mast cell of mouse in presence of cytochalasin E. Left panel: Relaxation, 25.0 s of data shown at 6 fps (25 x 6 frames). Right panel: Tube pull-back towards the cell when the optical trap was removed, 23.6 s of data shown at 6 fps (23.6 x 6 frames). Dimensions of image in movies are 13.8 by 28.6  $\mu\text{m}$ .
