# Supplementary material
Source: PubMed Central journal article supplement (PMC3529002)
Supplement: NIHMS421842-supplement-ESI_-_Table_S1.pdf [file NIHMS421842-supplement-ESI_-_Table_S1.pdf]

Table S.1. Fit to Eq.3 (Rise) and Eq. 4 (Decay) WO working objects SD: standard deviation (P values < 0.0001).

| Rise    | Slope     |        |        | Rate     |      |
|---------|-----------|--------|--------|----------|------|
|         | $pN^{-1}$ | SD     | nm/wo  | $s^{-1}$ | SD   |
| average | -0.066    | 0.0141 | -0.269 | 0.274    | 0.04 |
| Decay   |           |        |        |          |      |
| fast    | 0.0678    | 0.0100 | 0.276  | 99       | 5    |
| slow    | 0.0254    | 0.0058 | 0.103  | 5.6      | 0.8  |
| average | 0.0653    | 0.0184 | 0.266  | 32       | 12   |

Decay and off-rate determined from the fit of the rise phase of the sawtooth to **Eq.X** ( $p$  value < 0.001).

|                  | Decay               |        |       |       | off-rate        |       |     |                |
|------------------|---------------------|--------|-------|-------|-----------------|-------|-----|----------------|
|                  | pN <sup>-1</sup>    | SD     | nm    | SD    | s <sup>-1</sup> | SD    | num | r <sup>2</sup> |
| Control          | -0.053 <sup>a</sup> | 0.0038 | -3.22 | 0.230 | 0.210           | 0.016 | 45  | 0.82           |
| All <sup>†</sup> | -0.051 <sup>a</sup> | 0.0036 | -3.10 | 0.217 | 0.211           | 0.019 | 74  | 0.74           |
|                  | -0.050 <sup>b</sup> | 0.0029 | -3.06 | 0.178 | 0.231           | 0.032 | 8   | 0.98           |
|                  | -0.051 <sup>c</sup> | 0.0058 | -3.10 | 0.360 | 0.227           | 0.035 | 32  | 0.72           |
|                  | -0.044 <sup>d</sup> | 0.0038 | -2.71 | 0.230 | 0.179           | 0.021 | 59  | 0.71           |

|       |       |
|-------|-------|
| nm    | SD    |
| -3.22 | 0.230 |
| -3.10 | 0.217 |
| -3.06 | 0.178 |
| -3.10 | 0.360 |
| -2.71 | 0.230 |

|                  | Decay               |        | off-rate        |       |     |                |
|------------------|---------------------|--------|-----------------|-------|-----|----------------|
|                  | pN <sup>-1</sup>    | SD     | s <sup>-1</sup> | SD    | num | r <sup>2</sup> |
| Control          | -0.053 <sup>a</sup> | 0.0038 | 0.210           | 0.016 | 45  | 0.82           |
| All <sup>†</sup> | -0.051 <sup>a</sup> | 0.0036 | 0.211           | 0.019 | 74  | 0.74           |
|                  | -0.050 <sup>b</sup> | 0.0029 | 0.231           | 0.032 | 8   | 0.98           |
|                  | -0.051 <sup>c</sup> | 0.0058 | 0.227           | 0.035 | 32  | 0.72           |
|                  | -0.044 <sup>d</sup> | 0.0038 | 0.179           | 0.021 | 59  | 0.71           |
